# Supplementary material for: Bridging the gap between single-cell migration and collective dynamics
Source: eLife journal article supplement (doi:10.7554/elife.46842), 2019-12-06
Supplement: code1 [file Figure_List.xlsx]

## Sheet: Sheet 1
Figure	Simulation Code	Processing Code	Analysis Code	Simulation Parameters	Substrate File (rename to CustomPattern.h5)
Figure 2 (A)	CPM_NoDivision	TrajectoryAnalysisSingle	single_Q_MSD	single_Q
Figure 2 (B-F)	CPM_NoDivision	TrajectoryAnalysisSingle	single_Q	single_Q
Figure 2 - Figure supplement 1 (A-D)	CPM_NoDivision	TrajectoryAnalysisSingle	single_DQ	single_DQ
Figure 2 - Figure supplement 1 (E-H)	CPM_NoDivision	TrajectoryAnalysisSingle	single_Dm	single_DM
Figure 3	CPM_NoDivision	TrajectoryAnalysisSingle	single_R	single_R
Figure 4	CPM_NoDivision	TrajectoryAnalysisCircularMicropattern	rotation_Q	rotation_Q
Figure 4 - Figure supplement 1	CPM_NoDivision	TrajectoryAnalysisCircularMicropattern	rotation_N	rotation_N_R1
Figure 4 - Figure supplement 2	CPM_NoDivision	TrajectoryAnalysisCircularMicropattern	rotation_N	rotation_N_R2
Figure 4 - Figure supplement 3	CPM_NoDivision	TrajectoryAnalysisCircularMicropattern	rotation_N	rotation_N_R3
Figure 5 (A-D)	CPM_Division		tissue_kymo	wound_nodiv	CustomPattern_narrow.h5
Figure 5 (E-H)	CPM_Division		tissue_kymo	wound_div	CustomPattern_narrow.h5
Figure 5 - Figure supplement 1 (A,B)	CPM_Division_Supplement	FrontAnalysis	wound_A	wound_div_A	CustomPattern_wide.h5
Figure 5 - Figure supplement 1 (C,D)	CPM_Division_Supplement	FrontAnalysis	wound_div_D	wound_div_D	CustomPattern_wide.h5
Figure 5 - Figure supplement 1 (E,F)	CPM_Division_Supplement	FrontAnalysis	wound_div_Q	wound_div_Q	CustomPattern_wide.h5
Figure 6 (A-D)	CPM_Division		tissue_kymo	wound_div_fing_1.0	CustomPattern_narrow.h5
Figure 6 (E-H)	CPM_Division		tissue_kymo	wound_div_fing_1.1	CustomPattern_narrow.h5
Appendix 2 Figure 1	CPM_NoDivision	TrajectoryAnalysisSingle	single_A	single_A
